# Supplementary material
Source: Elsevier journal article supplement (https://rcastoragev2.blob.core.windows.net/d0f7056e0f59f3244bbcc888b0c79a86/mmc1.pdf)
Supplement: mmc1 [file mmc1.pdf]

**Cell Reports, Volume 27**

## **Supplemental Information**

### **Intercellular Calcium Signaling Induced by ATP**

#### **Potentiates Macrophage Phagocytosis**

**Sara Zumerle, Bianca Cali, Fabio Munari, Roberta Angioni, Francesco Di Virgilio, Barbara Molon, and Antonella Viola**

# SUPPLEMENTAL FIGURE 01

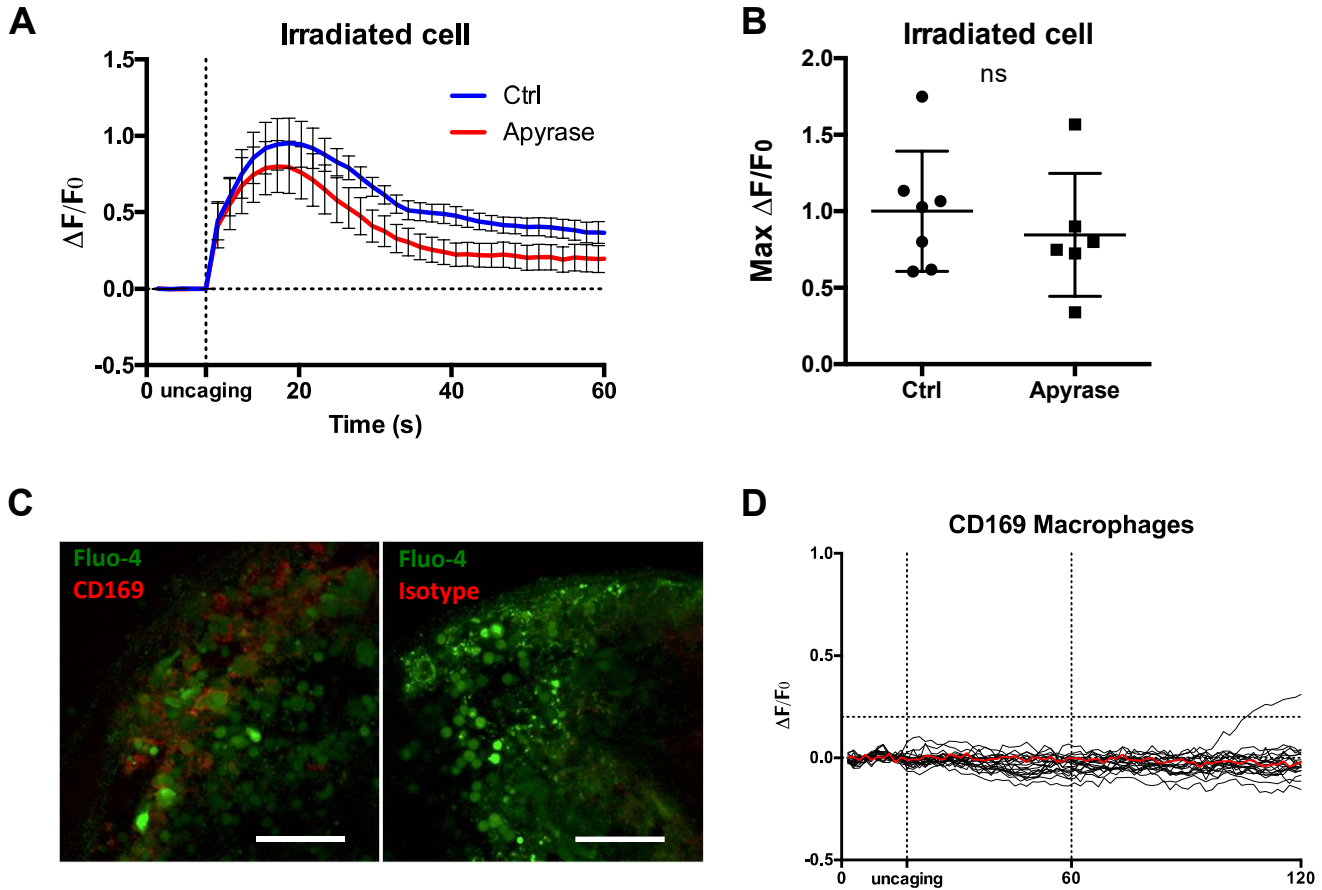

**Figure S1. Propagation of calcium signals by macrophages.** Related to Figure 1.

**A-B)** The Fluo4 fluorescence variation of the irradiated cell (origin cell) is compared in the control (Ctrl) and apyrase conditions. The  $\Delta F/F_0$  is similar in the two conditions, as shown by the average traces (A) or the maximal  $\Delta F/F_0$  calculated for repeated experiments (B).  $n=6$  cells. Error bars represent s.e.m. For data analysis, Student t-test was used (ns = non significant).

**C)** Mice were subcutaneously injected with a fluorescently-labelled anti CD-169 (shown in red - left) or the appropriate isotype control (right). 1 hour later, fresh murine popliteal lymph nodes were enclosed in 4% agarose gel, cut into 200  $\mu\text{m}$ -slices and loaded Fluo4-AM (shown in green). Scalebar: 50  $\mu\text{m}$ .

**D)** Representative traces of the control live calcium imaging experiment performed with lymph nodes loaded with Fluo4-AM only, showing the fluorescence variation after the UV-irradiation of the origin cell (red) and the bystander macrophages (black).

## SUPPLEMENTAL FIGURE 02

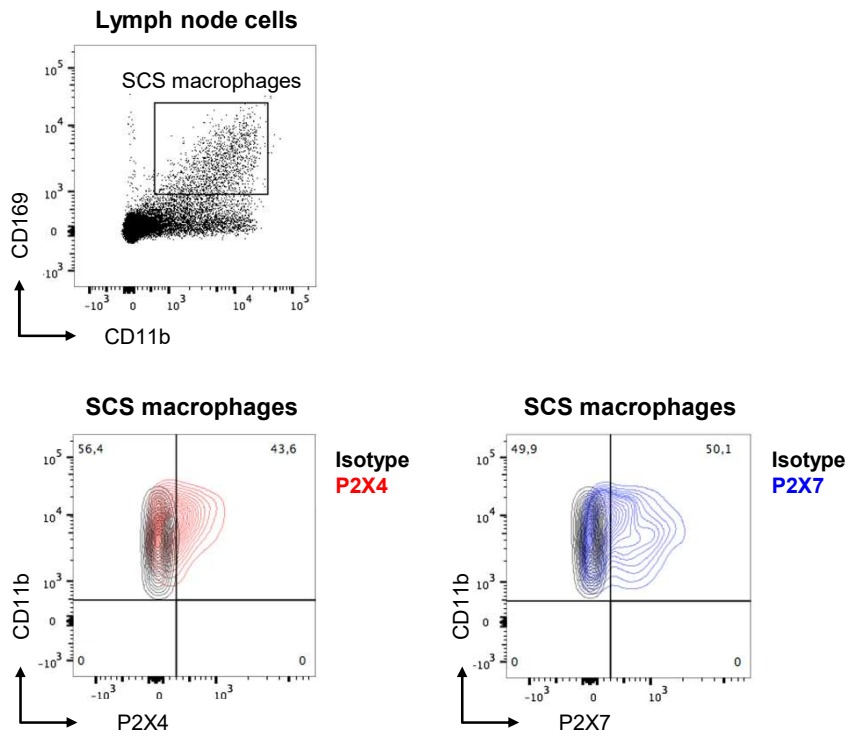

**Figure S2. P2X4R and P2X7R mediate ATP-dependent calcium signal propagation.** Related to Fig. 2.

To identify subcasular (SCS) macrophages, lymph node cell suspensions were stained with anti-CD11b and anti-CD169 antibodies (top panel). The expression of P2X4R and P2X7R was then assessed in the CD11b<sup>+</sup> CD169<sup>+</sup> population with the P2X4 or P2X7-specific antibody or their isotype controls.

## SUPPLEMENTAL FIGURE 03

**A**

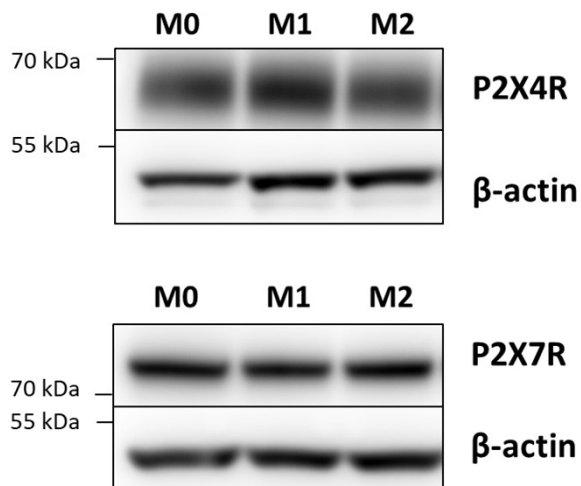

**B**

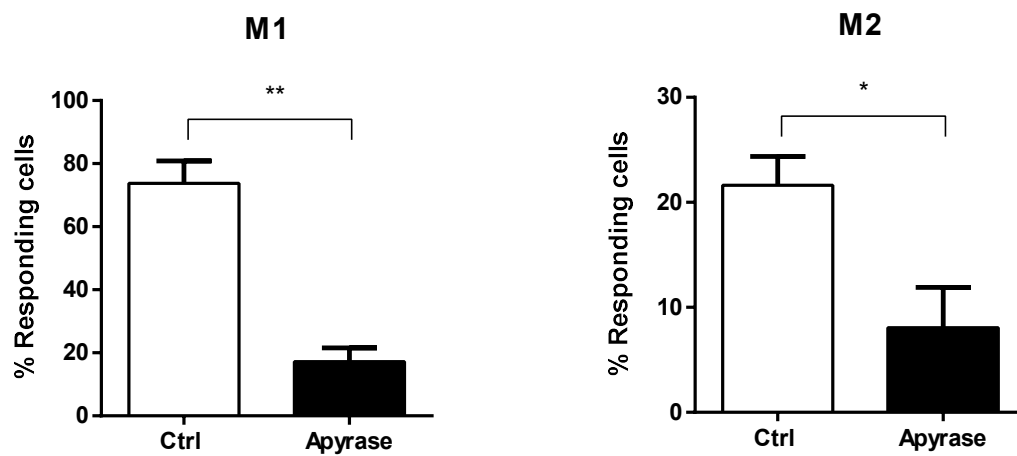

**Figure S3. Macrophage polarization status affects calcium signal propagation.** Related to Fig. 3.

**A)** The total expression of P2X4R (top) and P2X7R (bottom) was analysed by flow cytometry in resting (M0), IFN $\gamma$ -treated (M1) or IL4-treated (M2) macrophages and analysed by western blot on total cell lysates.

**B)** Quantification of 3 repeated live calcium imaging experiments performed with M1 (left) or M2 (right) macrophages, treated or not with 5 U/ml apyrase. Error bars represent s.e.m. For data analysis, Student t-test was used (\*= $p > 0.05$ ; \*\*= $p < 0.01$ ).

## SUPPLEMENTAL FIGURE 04

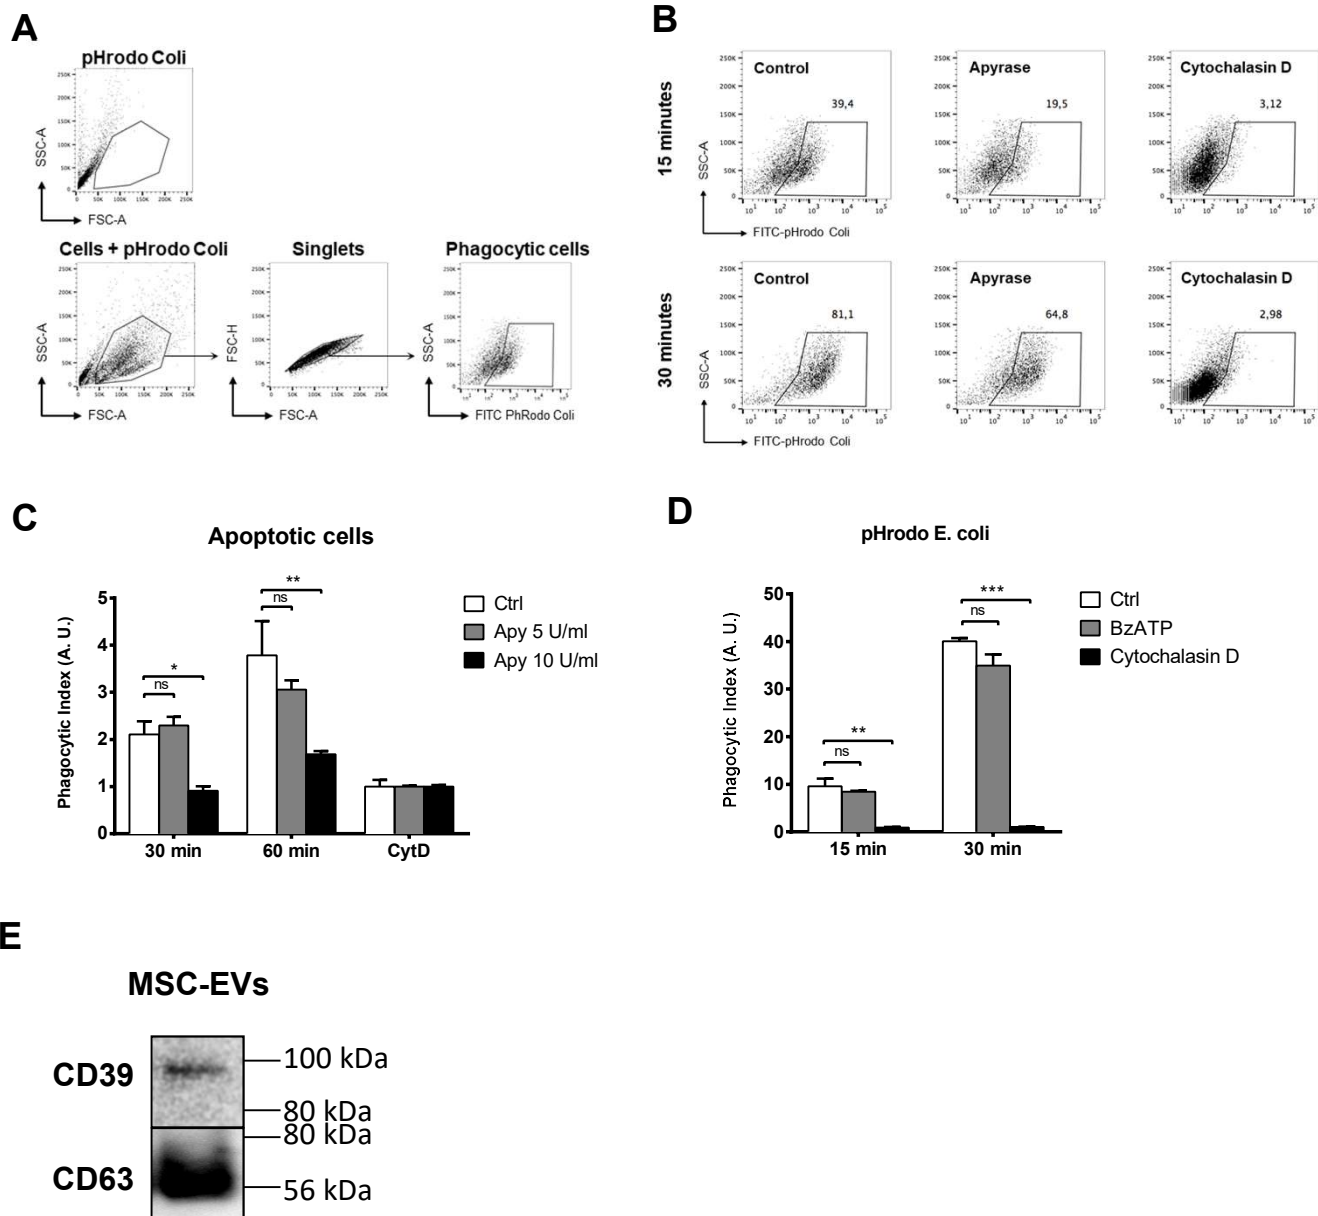

**Figure S4. Extracellular ATP is required for efficient phagocytosis.** Related to Fig. 4.

**A-B)** Gating strategy (A) and representative dot plots (B) of *in vitro* phagocytosis assay of PhRodo-Coli fluorescent bioparticles. Cytochalasin D was used as negative control.

**C)** BMDM were incubated with apoptotic B16F10 cells, in presence or absence of apyrase. Phagocytosis was monitored after 30 and 60 minutes by flow cytometry. Macrophage treated with 20  $\mu$ M Cytochalasin D were used as negative reference. The graph is representative of 3 repeated experiments. Error bars represent s.e.m.. For Data Analysis, Two-way ANOVA followed by Tukey's multiple comparisons test was used (ns= non significant; \* =  $p < 0,05$ ; \*\* =  $p < 0,01$ ).

**D)** Primary BMDM were incubated with PhRodo® E. coli fluorescent bioparticles in presence or absence of 100  $\mu$ M BzATP. Phagocytosis was monitored by flow cytometry. Macrophage treated with 20  $\mu$ M Cytochalasin D were used as negative reference. The graph is representative of 3 repeated experiments. Error bars represent s.e.m.. For Data Analysis, Two-way ANOVA followed by Tukey's multiple comparisons test was used (ns= non significant; \*\* =  $p < 0,01$ ; \*\*\* =  $p < 0,001$ ).

**E)** Western blot analysis of CD39 and of CD63 expression by MSC-derived EVs. CD63 is a typical marker of extracellular vesicles.
